# Supplementary material for: Recombinant single-cycle influenza virus with exchangeable pseudotypes allows repeated immunization to augment anti-tumour immunity with immune checkpoint inhibitors
Source: eLife. 2023 Jan 10;12:e76414. doi: 10.7554/eLife.76414 (PMC9831609; doi:10.7554/eLife.76414)
Supplement: Figure 1—source data 1. [file elife-76414-fig1-data1.xlsx]

## Sheet: Sheet1
PBS	GFP S-FLU 1x106 TCID50	NY ESO -1 S-FLU 5x106 TCID50	NY ESO -1 S-FLU 1x106 TCID50	PBS	GFP S-Flu 1x106 TCID50	NY ESO -1 S-FLU 5x106 TCID50	NY- ESO- 1 S-FLU FLU 1x106 TCID50
0.19	23.3	36.1	33.1	0.054	0.2	6.44	15.9
1.17	23.1	30.1	17.2		0.13	8.48	6.9
	39.1	28.9	20.5		0.15	11.6	3.36
	27.2	25.25	24.5		0.2	10.5	6.5
	25.45	30.5	22.5		0.12	8.6	7.5
