# Supplementary material for: Recombinant single-cycle influenza virus with exchangeable pseudotypes allows repeated immunization to augment anti-tumour immunity with immune checkpoint inhibitors
Source: eLife. 2023 Jan 10;12:e76414. doi: 10.7554/eLife.76414 (PMC9831609; doi:10.7554/eLife.76414)
Supplement: Figure 1—source data 3. [file elife-76414-fig1-data3.xlsx]

## Sheet: Sheet1
PBS	GFP S- FLU	NY-ESO-1 S-FLU
1.6	1.2	92
1.2	2.4	82
2.97	2.8	75
1.2	2.8	84
