# Supplementary material for: Recombinant single-cycle influenza virus with exchangeable pseudotypes allows repeated immunization to augment anti-tumour immunity with immune checkpoint inhibitors
Source: eLife. 2023 Jan 10;12:e76414. doi: 10.7554/eLife.76414 (PMC9831609; doi:10.7554/eLife.76414)
Supplement: Figure 2—source data 1. [file elife-76414-fig2-data1.xlsx]

## Sheet: Sheet1
No infection	GFP S-FLU	NY-ESO -1 S- FLU (IN)	NY-ESO -1 S-FLU (IN+IN)
74	31	12	2
65	47	9	3
69	28	9	3
51	43	17	3
59	26	11	1
		7
