# Supplementary material for: Recombinant single-cycle influenza virus with exchangeable pseudotypes allows repeated immunization to augment anti-tumour immunity with immune checkpoint inhibitors
Source: eLife. 2023 Jan 10;12:e76414. doi: 10.7554/eLife.76414 (PMC9831609; doi:10.7554/eLife.76414)
Supplement: Figure 2—source data 2. [file elife-76414-fig2-data2.xlsx]

## Sheet: Sheet1
No infection	GFP S- FLU	NY-ESO-1 S- FLU (I.N)	NY- ESO-1 S- FLU (I.N+I.N)
108	98	22	16
88	72	64	8
112	98	78	6
98	112	34	24
76	88	20	20
74	58	58	48
