# Supplementary material for: Recombinant single-cycle influenza virus with exchangeable pseudotypes allows repeated immunization to augment anti-tumour immunity with immune checkpoint inhibitors
Source: eLife. 2023 Jan 10;12:e76414. doi: 10.7554/eLife.76414 (PMC9831609; doi:10.7554/eLife.76414)
Supplement: Figure 2—source data 3. [file elife-76414-fig2-data3.xlsx]

## Sheet: Sheet1
No infection	GFP S-FLU	NY ESO-1 S-FLU (IN)	NY ESO-1 S-FLU (IN+IN)
80000	21000	5000	170
8000	1100	500	280
67000	5000	14000	290
13000	14000	10000	100
23000	20000	21000	310
2700	800	11000	900
15000	400	3600	900
