# Supplementary material for: Recombinant single-cycle influenza virus with exchangeable pseudotypes allows repeated immunization to augment anti-tumour immunity with immune checkpoint inhibitors
Source: eLife. 2023 Jan 10;12:e76414. doi: 10.7554/eLife.76414 (PMC9831609; doi:10.7554/eLife.76414)
Supplement: Figure 3—source data 1. [file elife-76414-fig3-data1.xlsx]

## Sheet: Sheet1
+++	+++	++-	++-	+-+	+-+	-++	-++	+--	+--	-+-	-+-	--+	--+
0.11	0.03	0.03	0.013	1.2	0.1	0	0.013	2.2	0.51	0	0.04	0.14	0.1
0.29	0.03	0.02	0.07	1.4	0.261	0	0	3.13	1.01	0.02	0.06	0.14	0
0.45	0.18	0.1	0.22	2.42	1.3	0	0	3.5	2.7	0	0	0.12	0.083
0.45	0.192	0.06	0.23	3.2	1.2	0	0	3.62	2.1	0	0	0.13	0.01
1.2	0.12	0.63	0.12	3.5	1.1	0	0	8.2	2	0	0	0.311	0.04
IM	IN	IM	IN	IM	IN	IM	IN	IM	IN	IM	IN	IM	IN
