# Supplementary material for: Recombinant single-cycle influenza virus with exchangeable pseudotypes allows repeated immunization to augment anti-tumour immunity with immune checkpoint inhibitors
Source: eLife. 2023 Jan 10;12:e76414. doi: 10.7554/eLife.76414 (PMC9831609; doi:10.7554/eLife.76414)
Supplement: Figure 3—source data 2. [file elife-76414-fig3-data2.xlsx]

## Sheet: Sheet1
+++	+++	++-	++-	+-+	+-+	-++	-++	+--	+--	-+-	-+-	--+	--+
0.06	0.29	0.01	0.004	1.1	2.71	0	0	2.1	2	0	0	0.2	0.27
0.12	0.45	0.003	0.01	1.33	2.7	0	0.01	2.1	2.3	0	0	0.3	0.39
0.25	1.34	0.009	0.022	2.1	5.17	0	0	1.7	4.4	0.017	0	0.19	0.44
0.12	1.65	0.004	0.03	1.64	8.22	0	0	2.46	7.7	0	0	0.43	0.51
0.11	1.8	0.002	0.02	1.8	6.2	0	0	3.8	5.8	0	0	0.23	0.42
IM	IN	IM	IN	IM	IN	IM	IN	IM	IN	IM	IN	IM	IN
