# Supplementary material for: Recombinant single-cycle influenza virus with exchangeable pseudotypes allows repeated immunization to augment anti-tumour immunity with immune checkpoint inhibitors
Source: eLife. 2023 Jan 10;12:e76414. doi: 10.7554/eLife.76414 (PMC9831609; doi:10.7554/eLife.76414)
Supplement: Figure 3—source data 3. [file elife-76414-fig3-data3.xlsx]

## Sheet: Sheet1
+++	+++	++-	++-	+-+	+-+	-++	-++	+--	+--	-+-	-+-	--+	--+
0.62	0.24	0.02	0.1	2.8	1.45	0	0.01	2.2	1	0	0.01	0.14	0.06
0.57	0.47	0.015	0.18	2.4	1.44	0	0.03	3.12	1.41	0.02	0.013	0.14	0.03
0.76	0.69	0.08	0.133	2.4	2	0	0.013	3.5	3.2	0	0.03	0.12	0.03
0.972	0.78	0.06	0.31	3.2	1.8	0	0	3.62	4.1	0	0.013	0.13	0.12
1.2	0.81	0.05	0.28	3.8	2.1	0	0	3.6	3	0	0.012	0.11	0.1
IM	IN	IM	IN	IM	IN	IM	IN	IM	IN	IM	IN	IM	IN
