# Supplementary material for: Recombinant single-cycle influenza virus with exchangeable pseudotypes allows repeated immunization to augment anti-tumour immunity with immune checkpoint inhibitors
Source: eLife. 2023 Jan 10;12:e76414. doi: 10.7554/eLife.76414 (PMC9831609; doi:10.7554/eLife.76414)
Supplement: Figure 3—source data 4. [file elife-76414-fig3-data4.xlsx]

## Sheet: Sheet1
+++	+++	++-	++-	=-+	=-+	-++	-++	+--	+--	-+-	-+-	--+	--+
0.398	0.88	0	0.006	2.42	5.91	0	0	1.82	3.7	0.02	0.01	0.34	0.19
0.122	1.12	0.001	0.014	1.28	4.95	0	0	2.1	3.7	0	0.01	0.29	0.21
0.375	2.79	0.001	0.05	3.5	10.31	0.01	0.011	3.7	8.23	0	0	0.42	0.3
0.4124	1.25	0.004	0.02	6.1	6.02	0	0	4.1	4.15	0.008	0	0.41	0.23
0.382	2.2	0.002	0.018	6.8	6.8	0	0	4.2	4.8	0	0	0.28	0.21
IM	IN	IM	IN	IM	IN	IM	IN	IM	IN	IM	IN	IM	IN
