# Supplementary material for: Recombinant single-cycle influenza virus with exchangeable pseudotypes allows repeated immunization to augment anti-tumour immunity with immune checkpoint inhibitors
Source: eLife. 2023 Jan 10;12:e76414. doi: 10.7554/eLife.76414 (PMC9831609; doi:10.7554/eLife.76414)
Supplement: Figure 3—source data 5. [file elife-76414-fig3-data5.xlsx]

## Sheet: Sheet1
IN	IM
22.2	16.6
15.9	15.1
18.2	11.1
21.5	9
20.6	11
