# Supplementary material for: Recombinant single-cycle influenza virus with exchangeable pseudotypes allows repeated immunization to augment anti-tumour immunity with immune checkpoint inhibitors
Source: eLife. 2023 Jan 10;12:e76414. doi: 10.7554/eLife.76414 (PMC9831609; doi:10.7554/eLife.76414)
Supplement: Figure 3—source data 6. [file elife-76414-fig3-data6.xlsx]

## Sheet: Sheet1
IN	IM
12.1	10.8
14.54	8.86
9.44	8.1
15.59	7.7
10.82	6.43
