# Supplementary material for: Recombinant single-cycle influenza virus with exchangeable pseudotypes allows repeated immunization to augment anti-tumour immunity with immune checkpoint inhibitors
Source: eLife. 2023 Jan 10;12:e76414. doi: 10.7554/eLife.76414 (PMC9831609; doi:10.7554/eLife.76414)
Supplement: Figure 3—source data 7. [file elife-76414-fig3-data7.xlsx]

## Sheet: Sheet1
IN	IM
1.72	3.54
1.3	4.09
1.55	2.94
1.31	1.92
1.52	3.42
