# Supplementary material for: Recombinant single-cycle influenza virus with exchangeable pseudotypes allows repeated immunization to augment anti-tumour immunity with immune checkpoint inhibitors
Source: eLife. 2023 Jan 10;12:e76414. doi: 10.7554/eLife.76414 (PMC9831609; doi:10.7554/eLife.76414)
Supplement: Figure 3—source data 8. [file elife-76414-fig3-data8.xlsx]

## Sheet: Sheet1
IN	IM
0.85	3.26
0.51	1.68
0.82	1.66
0.79	2.8
0.88	1.47
