# Supplementary material for: Recombinant single-cycle influenza virus with exchangeable pseudotypes allows repeated immunization to augment anti-tumour immunity with immune checkpoint inhibitors
Source: eLife. 2023 Jan 10;12:e76414. doi: 10.7554/eLife.76414 (PMC9831609; doi:10.7554/eLife.76414)
Supplement: Figure 3—source data 9. [file elife-76414-fig3-data9.xlsx]

## Sheet: Sheet1
IN	IM
4.02	8.42
4.72	9.35
2.7	12.4
3.75	7.12
4.12	5.17
