# Supplementary material for: Recombinant single-cycle influenza virus with exchangeable pseudotypes allows repeated immunization to augment anti-tumour immunity with immune checkpoint inhibitors
Source: eLife. 2023 Jan 10;12:e76414. doi: 10.7554/eLife.76414 (PMC9831609; doi:10.7554/eLife.76414)
Supplement: Figure 3—source data 10. [file elife-76414-fig3-data10.xlsx]

## Sheet: Sheet1
IN	IM
1.24	5.02
3.7	6.66
1.25	9.17
2.1	6.73
1.78	3.4
