# Supplementary material for: Recombinant single-cycle influenza virus with exchangeable pseudotypes allows repeated immunization to augment anti-tumour immunity with immune checkpoint inhibitors
Source: eLife. 2023 Jan 10;12:e76414. doi: 10.7554/eLife.76414 (PMC9831609; doi:10.7554/eLife.76414)
Supplement: Figure 4—source data 2. [file elife-76414-fig4-data2.xlsx]

## Sheet: Sheet1
S-NY-ESO-1 FLU (PR8)	S-NY-ESO-1 FLU(X31)	X31+ S-NY-ESO-1 FLU (PR8)	X31+ S-NY-ESO-1 FLU (X31)
12.7	8.92	18.7	4.63
8.73	11.4	19.4	3.83
15.9	11.5	21.8	3.81
9.38	7.35	22.7	2.44
10.32	9.87	17.4	2.38
8.68	7.39	31.5	2.08
7.47	10.2	28	5.87
8.72	7.87	30.7	7.79
7.7	9.4	26.4	10.5
8.88	8.24	24.8	10.3
7.5	9.76	19.3	6.4
10.2	10.23	23.4	8.87
