# Supplementary material for: Recombinant single-cycle influenza virus with exchangeable pseudotypes allows repeated immunization to augment anti-tumour immunity with immune checkpoint inhibitors
Source: eLife. 2023 Jan 10;12:e76414. doi: 10.7554/eLife.76414 (PMC9831609; doi:10.7554/eLife.76414)
Supplement: Figure 5—source data 1. [file elife-76414-fig5-data1.xlsx]

## Sheet: Sheet1
Days of post Tumor cells implantation	Tumor only / No infection					S-Flu NY ESO 1 IN+IN					S-Flu NY ESO 1 IM + IM
10	0.62	212	66	164	122	120	98	120	168	122	60	66	44	82	98
12	70	248	66	191	171	146	125	136	201	130	60	97	55	99	125
14	120	292	152	208.2	262	140	220	122	145	155	82	92	102	112	126
16	175	358	185	262	320	139	370	133	187	200	116	14.56	166	146	141
18	262	446	247	303	620	316	375	229	347	349	173	132	154	127	149
20	293	599	262	401	897.7	411	469	259	406	521	303	174	152	147	225
22	390	801	356	544	1450	540	626	403	562	725	345	172	361	268	425
24	560.64	953.67	656.976	656.476	1450	705.024	743.125	450.12	698.75	764.325	375.2	185.24	441.324	338.954	512.904
26	680.34	1120	825.7	765.25	1450	865.435	825.45	680.45	780.345	910.345	424.56	235.25	425.23	380.325	560.35
28	770.85	1245.65	925.45	865.25	1450	925.345	915.35	825.345	835.45	980.23	460.35	280.24	450.35	440.34	575.34
