# Supplementary material for: Recombinant single-cycle influenza virus with exchangeable pseudotypes allows repeated immunization to augment anti-tumour immunity with immune checkpoint inhibitors
Source: eLife. 2023 Jan 10;12:e76414. doi: 10.7554/eLife.76414 (PMC9831609; doi:10.7554/eLife.76414)
Supplement: Figure 5—source data 2. [file elife-76414-fig5-data2.xlsx]

## Sheet: Sheet1
Tumour only	IN+IN	IM+IM
0.11	0.061	12.4
0.015	0.42	7.52
0.21	5.42	6.25
1.5	3.45	9.84
2.16	2.82	7.26
0.44	3.12	1.15
0.43	1.98	5.93
1.9	2.44	3.45
