# Supplementary material for: Recombinant single-cycle influenza virus with exchangeable pseudotypes allows repeated immunization to augment anti-tumour immunity with immune checkpoint inhibitors
Source: eLife. 2023 Jan 10;12:e76414. doi: 10.7554/eLife.76414 (PMC9831609; doi:10.7554/eLife.76414)
Supplement: Figure 5—source data 3. [file elife-76414-fig5-data3.xlsx]

## Sheet: Sheet1
Tumor only	IN+IN	IM+IM
66	186	50
26	342	39
33	42	334
28	74	337
38	291	107
	97	57
