# Supplementary material for: Recombinant single-cycle influenza virus with exchangeable pseudotypes allows repeated immunization to augment anti-tumour immunity with immune checkpoint inhibitors
Source: eLife. 2023 Jan 10;12:e76414. doi: 10.7554/eLife.76414 (PMC9831609; doi:10.7554/eLife.76414)
Supplement: Figure 5—source data 4. [file elife-76414-fig5-data4.xlsx]

## Sheet: Sheet1
Tumor only	IN+IN	IM+IM
434	512	22325
335	438	8115
1509	3327	13913
285	1090	10634
670	21515	17086
	10832	10634
