# Supplementary material for: Recombinant single-cycle influenza virus with exchangeable pseudotypes allows repeated immunization to augment anti-tumour immunity with immune checkpoint inhibitors
Source: eLife. 2023 Jan 10;12:e76414. doi: 10.7554/eLife.76414 (PMC9831609; doi:10.7554/eLife.76414)
Supplement: Figure 5—source data 5. [file elife-76414-fig5-data5.xlsx]

## Sheet: Sheet1
Tumor only	IN+IN	IM+IM
80	6173	131
56	8519	125
221	8920	698
59	6210	145
122	2319	390
	8874	318
