# Supplementary material for: Recombinant single-cycle influenza virus with exchangeable pseudotypes allows repeated immunization to augment anti-tumour immunity with immune checkpoint inhibitors
Source: eLife. 2023 Jan 10;12:e76414. doi: 10.7554/eLife.76414 (PMC9831609; doi:10.7554/eLife.76414)
Supplement: Figure 5—source data 6. [file elife-76414-fig5-data6.xlsx]

## Sheet: Sheet1
Tumour only	IN+IN	IM+IM	Tumour only	IN+IN	IM+IM
2900	400	300	150	130	1
3600	540	500	120	80	1
1800	500	700	150	140	1
3100	200	600	230	1	1
5400	400	700	140	120	1
