# Supplementary material for: Recombinant single-cycle influenza virus with exchangeable pseudotypes allows repeated immunization to augment anti-tumour immunity with immune checkpoint inhibitors
Source: eLife. 2023 Jan 10;12:e76414. doi: 10.7554/eLife.76414 (PMC9831609; doi:10.7554/eLife.76414)
Supplement: Figure 6—source data 1. [file elife-76414-fig6-data1.xlsx]

## Sheet: Sheet1
	No infection					Fowl Pox-NY-ESO-1					Hu Ad5 NY-ESO-1					S-NY-ESO-1 FLU
0
2
4
6
8	122.34	142.3	124.3	132.45		154.32	93.42	143.5	114.34	109.835	103.45	124.56	124.3	54.3	43.4	45.6	67.4	60.945	75.67	82.34
10	168	214.65	195.2	190		179	162	280	225	207.3	136.4	155.5	147.5	82.3	63.2	72	93.4	99.2	106	119.5
12	282	366	318	280		287	203	350	304	289.9	228.8	182.7	160.8	142	142.688	126.88	182.7	160.8	142.065	142.688
14	345.65	492.35	498.4	483.8		316.45	319.76	438.7	404.5	436.6	298.76	245.6	309.6	144.5	236.5	146.4	238	246.6	165.06	198.68
16	386.72	691.152	663.48	587.232		428.682	393.25	502.24	505.616	517.6	352.656	302.08	388.224	175.968	325.6	196.98	352.107	353.808	180.198	204.82
18	473.76	823.515	722.55	647.208		577.514	451.625	601.76	603.87	585.93	485.317	439.184	539.175	369.28	449.596	233.376	435.6	412.5	243.906	287.56
20	578.448	1075.36	791.856	678.215		620.49	466.916	879.912	865.43	806.49	614.392	379.61	663.55	564.246	604.832	524.718	567.844	558.45	301.512	234.048
22	788.697	1126.7	1098.83	704.032		899.396	479.168	1015.94	1033.27	1010.86	847.21	703.248	834.234	699.36	756.756	672.672	634.57	634.24	460.512	365.04
24	986.735	1145.69	1108.79	832.56		1092.35	608.723	1123.91	1124.56	1178.9	865.78	894.565	912.453	768.345	845.234	734.129	721.983	734.213	589.321	421.896
26	1042.44	1239.4	1283.4	982.06		1193.45	743.4	1239.4	1214.5	1296.4	983.45	924.3	1123.5	894.32	934.502	783.45	789.453	805.32	703.24	503.45
