# Supplementary material for: Recombinant single-cycle influenza virus with exchangeable pseudotypes allows repeated immunization to augment anti-tumour immunity with immune checkpoint inhibitors
Source: eLife. 2023 Jan 10;12:e76414. doi: 10.7554/eLife.76414 (PMC9831609; doi:10.7554/eLife.76414)
Supplement: Figure 6—source data 2. [file elife-76414-fig6-data2.xlsx]

## Sheet: Sheet1
No infection	Fowl Pox-NY-ESO-1	Hu Ad5 NY-ESO-1	S -NY-ESO-1 FLU
2400	1300	200	50
11200	15000	400	200
50000	45000	2700	850
1000	4500	9800	1200
4000	4000	12800	1800
20000	12000	1000	800
30000	5000	5000	1200
12000		13000	320
		9000	240
		2000
