# Supplementary material for: Recombinant single-cycle influenza virus with exchangeable pseudotypes allows repeated immunization to augment anti-tumour immunity with immune checkpoint inhibitors
Source: eLife. 2023 Jan 10;12:e76414. doi: 10.7554/eLife.76414 (PMC9831609; doi:10.7554/eLife.76414)
Supplement: Figure 6—source data 3. [file elife-76414-fig6-data3.xlsx]

## Sheet: Sheet1
No infection	Fowl Pox-NY-ESO-1	Hu Ad5 NY-ESO-1	S-NY-ESO-1 FLU
4000	800	160	20
800	1200	200	70
700	200	300	200
1200	800	500	40
2800	720	60	30
3600		120	40
			40
