# Supplementary material for: Recombinant single-cycle influenza virus with exchangeable pseudotypes allows repeated immunization to augment anti-tumour immunity with immune checkpoint inhibitors
Source: eLife. 2023 Jan 10;12:e76414. doi: 10.7554/eLife.76414 (PMC9831609; doi:10.7554/eLife.76414)
Supplement: Figure 7—source data 1. [file elife-76414-fig7-data1.xlsx]

## Sheet: Sheet1
Days of post Tumor cells implantation	Tumor only / No infection + Anti PD-1 Ab						Tumor only / No infection + Isotype Ab						IN infection + Anti PD-1 Ab						IN infection + Isotype Ab						IM infection + Anti PD-1 Ab						IM infection + Isotype Ab
6	47.328	37.72	118.84				10.56	50.02	39.744				39.2	41.2	35.17				58.7	47.2	49.9		40.244	83.202	35.97	31.968	33.26	30.234	42.288	0	60.01	50.778	52.89	52.86	46.866	42.198
8	73.44	30.03	108.864	51.68	44.88	61.605	41.3	75.68	63.3	50.024	86.768	100.8	31.3	45.6	46.51	70.56	48.96	82.25	75.1	70.98	65.3		47.058	113.52	36.244	38.13	82.32	56.32	84.656	11.616	96.048	66.912	66.297	100.368	75.168	54.144
10	56.84	74.33	66.612	100.65	75.645	105.468	42.47	95.04	111.069	89.182	102.768	154.698	39.96	48.92	37.835	145.2	249.21	137.592	168.084	112.608	67.2		153.9	187.569	42.432	41.292	61.6	100.368	75.168	9.72	108	49.98	112.996	86.1	80.535	71.299
12	99.179	95.04	111.069	101.136	78.96	123.65	90.036	192.15	118.89	91.658	152.88	201.96	67.184	62.65	40.6	105.336	297.216	63.134	126.378	152.515	72.65		166.568	188.78	30.94	45.36	74.8	94.38	139.82	55.836	81.872	79.488	108.528	91.368	122.451	113.685
14	119.187	141.68	175.95	191.808	134.75	129.36	115.056	207.36	123.76	159.315	202.44	310.98	82.242	87.6	66.24	222.528	333.5	319.056	175.824	164.32	110.544		157.584	416.556	56.7	10.24	135.42	104.96	220.374	54.18	96.2	97.008	160.512	104.832	163.268	174.64
16	177.48	152.24	208.196	227.792	260.13	287.68	143.259	387.09	168.504	240.312	311.984	507.6	96.56	102.56	76.54	338.256	427.916	367.688	186.796	191.345	132.804		387.6	592.515	62.72	16.788	158.76	202.215	214.5	41.514	134.68	102.32	165.528	160.524	214.136	261.3
18	362	188.56	396.9	397.8	325.456	307.568	283.04	587.574	220.6	302.676	370.656	721.14	165.786	176.89	164.87	387.678	244	432.788	205.65	312.768	143.876		456.24	608.244	107.658	18.566	218.769	286.824	255.656	82.362	266	155.55	243.236	275.616	273.24	321.344
21	553.224	228.76	422.678	432.656	448.578	462.672	607.84	853.308	643.064	562.44	875.67	1000.78	343.712	324.566	322.456	402.322	323.457	466.544	264.11	486.719	484.7		606.816	728	148.5	27.06	244.96	317.52	536.536	105.534	321.708	227.45	302.66	454.008	380.457	413.28
22	754.992	306.566	565.788	654.322	588.422	622.42	626.808	986.56	707.8	798.128	934.544	1048.77	413.92	402.366	309.14	534.234	455.766	601.234	383.69	664.766	593.6		766.884	812.344	175.968	66.092	340.56	326.466	566.788	144.644	504.165	299.592	412.344	512.344	446.44	560.56
24	754.992	625.315	766.68	788.344	645.344	794.244	905.52	1086.65	865.44	896.344	964.212	1056.34	556.768	612.344	522.566	684.298	602.324	712.712	499.32	912.444	707.952		886.242	942.12	182.344	66.092	346.566	366.208	552.786	166.966	522.346	307.8	570.045	688.328	0.388	512.866
27	905.52	688.95	805.456	902.344	722.46	988.34	986.455	1124.46	912.344	1092.32	1022.34	1078.97	686.456	744.324	604.566	842.288	712.342	804.278	544.466	885.016	946.68		1024.24	1080.34	267.036	101.52	342.24	408.446	549.34	244.644	611.252	502.656	589.69	816.544	654.54	488.44
29	1033.44	756.66	965.44	1079.08	880.922	1170.31	1120.34	1190.44	1086.57	1180.34	1180.42	1192.42	766.56	877.656	768.988	998.13	832.872	943.214	622.566	899.988	1004.47		1150.25	1180	302.344	142.344	388.344	436.914	513	317.504	656.44	614.488	602.344	969.612	712.448	457.6
