# Supplementary material for: Recombinant single-cycle influenza virus with exchangeable pseudotypes allows repeated immunization to augment anti-tumour immunity with immune checkpoint inhibitors
Source: eLife. 2023 Jan 10;12:e76414. doi: 10.7554/eLife.76414 (PMC9831609; doi:10.7554/eLife.76414)
Supplement: Figure 7—source data 2. [file elife-76414-fig7-data2.xlsx]

## Sheet: Sheet1
Isotype Ctl	Anti PD1 Ab	Isotype Ctl	Anti PD1 Ab	Isotype Ctl	Anti PD1 Ab
0.13	0.16	1.57	1.96	4.17	3.78
0.62	0.81	2.51	8.8	0.48	5.46
0.25	1.72	8.45	6.42	4.02	5.74
0.2	0.13	0.67	1.98	10.2	9.25
0.43	0.74	10.9	1.82	8.99	13.5
0.37		0.42	8.19	15	5.39
