# Supplementary material for: Recombinant single-cycle influenza virus with exchangeable pseudotypes allows repeated immunization to augment anti-tumour immunity with immune checkpoint inhibitors
Source: eLife. 2023 Jan 10;12:e76414. doi: 10.7554/eLife.76414 (PMC9831609; doi:10.7554/eLife.76414)
Supplement: Figure 7—source data 3. [file elife-76414-fig7-data3.xlsx]

## Sheet: Sheet1
Isotype Ctl	Anti PD1 Ab	Isotype Ctl	Anti PD1 Ab	Isotype Ctl	Anti PD1 Ab
6200	4800	660	400	2800	140
5400	3400	2600	56	600	40
10400	800	580	120	680	400
11800	1200	1600	380	1400	280
8600	900	1800	1200	3800	500
2400	1600	580	60	1200	120
