# Supplementary material for: Recombinant single-cycle influenza virus with exchangeable pseudotypes allows repeated immunization to augment anti-tumour immunity with immune checkpoint inhibitors
Source: eLife. 2023 Jan 10;12:e76414. doi: 10.7554/eLife.76414 (PMC9831609; doi:10.7554/eLife.76414)
Supplement: Figure 7—source data 4. [file elife-76414-fig7-data4.xlsx]

## Sheet: Sheet1
Isotype Ctl	Anti PD1 Ab	Isotype Ctl	Anti PD1 Ab	Isotype Ctl	Anti PD1 Ab
6.13	5.12	7.14	24.4	12.01	28.34
20.3	11.7	14.74	21.63	15.84	21.02
9	9.32	14.65	34.47	14.6	16.2
